# Supplementary material
Source: Research Square preprint supplement (doi:10.21203/rs.3.rs-10259901/v1)
Supplement: Supplementary file 1 [file 38e2dba28ebb05961da94e4b.docx]

**Supplemental Data**

**Supplemental Table 1.** Average weight (g), fork length (cm), and total length (cm) of fish and oysters collected from Galveston Bay (mean ± standard error).

| **Common name** | ***n*** | **Weight (g)** | **Fork length (cm)** | **Stretch total length (cm)** |
| --- | --- | --- | --- | --- |
| Eastern oyster | 10 | 12.83 ± 2.19 | **-** | **-** |
| Gafftopsail catfish | 10 | 1503 ± 97.92 | 45.11 ± 0.80 | 54.51 ± 0.91 |
| Red drum | 10 | 1611.4 ± 185.61 | 47.40 ± 1.35 | 53.67 ± 1.59 |
| Spotted seatrout | 10 | 1071 ± 207.23 | 42.07 ± 2.77 | 47.11 ± 2.91 |

**Supplemental Table 2.** Muscle concentration of PAH, PCB and NMP congeners found in biota collected from Galveston Bay. Levels are reported in ng/g tissue dry weight (DW) for PAHs, PCBs; and in µg/g dry weight (DW) for NMPs (mean ± standard error). Significant differences are denoted using letters. Levels below the limit of detection are represented by “- “.

| **(a) PAHs (ng/g DW)** | **Oyster (n=9)** | **Catfish (n=8)** | **Red drum (n=9)** | **Seatrout (n=8)** |
| --- | --- | --- | --- | --- |
| Low molecular weight (LMW) |  |  |  |  |
| ACE | 197.64 ± 38.98 | 95.64 ± 15.25 | 66.13 ± 17.37 | 249.71 ± 99.04 |
| FLU | 103.39 ± 37.99 | 13.46 ± 4.18 | 27.98 ± 9.04 | 63.21 ± 21.87 |
| PHE | 117.09 ± 10.45 | 118.04 ± 22.46 | 54.85 ± 7.82 | 151.56 ± 34.01 |
| ANT | 6.76 ± 3.72 | 8.05 ± 2.12 | 2.97 ± 0.96 | 11.20 ± 2.14 |
| High molecular weight (HMW) |  |  |  |  |
| FLT | - | 13.84 ± 3.68 | 2.42 ± 2.42 | 2.58 ± 1.64 |
| PYR | 7.18 ± 2.95 | 18.81 ± 2.55 | 6.57 ± 2.61 | 8.90 ± 6.02 |
| BaA | 15.70 ± 4.14 | 4.90 ± 1.93 | 5.98 ± 2.21 | 8.89 ± 2.09 |
| CHR | 15.61 ± 3.39 | 2.31 ± 0.88 | 2.47 ± 0.79 | 12.19 ± 3.30 |
| BbF | 1.17 ± 0.86 | 15.82 ± 7.10 | 0.38 ± 0.38 | 7.73 ± 2.90 |
| BkF | 31.08 ± 13.46 | 27.60 ± 8.50 | 60.15 ± 6.91 | 44.80 ± 11.25 |
| BaP | 16.07 ± 5.08 | 2.93 ± 1.80 | 3.67 ± 1.20 | 9.17 ± 2.90 |
| IcdP | 6.54 ± 2.27 | 1.93 ± 0.94 | 1.01 ± 1.01 | 5.48 ± 2.12 |
| DahA | 76.79 ± 46.07 | 2.32 ± 2.32 | 13.44 ± 1.82 | 19.03 ± 9.46 |
| BghiP | 13.48 ± 3.33 | 3.05 ± 1.50 | 4.050 ± 1.53 | 10.84 ± 2.83 |
| **ΣPAHs** | **608.51 ± 15.72a** | **328.70 ± 9.73a,b** | **252.06 ± 6.44b** | **605.30 ± 19.08a** |
| **(b) PCBs (ng/g DW)** | **Oyster (n=9)** | **Catfish (n=8)** | **Red drum (n=9)** | **Seatrout (n=8)** |
| Non-ortho  (dioxin like) |  |  |  |  |
| PCB 77 | 53.60 ± 37.42 | - | 0.46 ± 0.46 | 0.56 ± 0.56 |
| PCB 81 | 10.93 ± 4.22 | - | - | 2.83 ± 1.48 |
| PCB 126 | 0.03 ± 0.03 | - | 0.77 ± 0.77 | 3.98 ± 1.60 |
| PCB 169 | 8.39 ± 4.25 | - | 0.57 ± 0.57 | 1.68 ± 1.21 |
| Mono-ortho  (dioxin like) |  |  |  |  |
| PCB 105 | 0.49 ± 0.49 | 2.01 ± 1.01 | 2.63 ± 1.97 | 5.88 ± 3.84 |
| PCB 114 | - | - | 1.13 ± 1.13 | 3.14 ± 1.47 |
| PCB 118 | 2.50 ± 1.35 | 8.50 ± 4.10 | - | 2.78 ± 1.40 |
| PCB 123 | 0.45 ± 0.45 | - | - | 2.97 ± 1.23 |
| PCB 156 | - | - | - | 0.95 ± 0.95 |
| PCB 167 | 4.15 ± 3.24 | 2.94 ± 1.44 | 0.55 ± 0.55 | 38.00 ± 23.25 |
| PCB 189 | - | - | - | 0.49 ± 0.49 |
| Non-dioxin like |  |  |  |  |
| PCB 1 | - | - | - | - |
| PCB 18 | 43.00 ± 8.66 | 0.80 ± 0.80 | 0.43 ± 0.43 | 5.98 ± 2.18 |
| PCB 33 | 9.18 ± 3.18 | - | 0.92 ± 0.61 | 0.55 ± 0.55 |
| PCB 52 | 2.79 ± 1.43 | 14.14 ± 2.92 | 7.45 ± 1.04 | 13.48 ± 2.22 |
| PCB 95 | 0.50 ± 0.50 | 0.85 ± 0.85 | - | 0.71 ± 0.71 |
| PCB 101 | 1.32 ± 0.91 | 14.22 ± 5.37 | - | 1.36 ± 0.92 |
| PCB 128 | 148.39 ± 39.20 | 6.89 ± 2.72 | - | 93.13 ± 51.85 |
| PCB 138 | - | 47.66 ± 18.04 | - | 3.16 ± 2.35 |
| PCB 149 | - | 9.10 ± 3.76 | - | 0.82 ± 0.82 |
| PCB 153 | - | 36.60 ± 13.92 | - | 1.37 ± 0.92 |
| PCB 157 | - | 0.64 ± 0.64 | - | 0.97 ± 0.97 |
| PCB 170 | 0.84 ± 0.84 | 9.31 ± 4.72 | - | 1.62 ± 1.14 |
| PCB 171 | - | 1.80 ± 1.18 | - | - |
| PCB 177 | - | - | - | 0.84 ± 0.84 |
| PCB 180 | - | 27.32 ± 11.48 | - | - |
| PCB 183 | **-** | 7.58 ± 2.85 | - | 1.43 ± 0.95 |
| PCB 187 | - | 18.92 ± 7.26 | - | - |
| **ΣPCBs** | **286.56 ± 5.65a** | **209.29 ± 2.28a** | **14.90 ± 0.28b** | **188.69 ± 3.48a** |
| **(c) NMPs (µg/g DW)** | **Oyster (n=10)** | **Catfish (n=9)** | **Red drum (n=10)** | **Seatrout (n=10)** |
| PMMA | - | - | - | - |
| PP | 7,057.07 ± 5261.07 | - | - | 2,146.60 ± 1,148.99 |
| PVC | - | - | - | - |
| PA | - | 6.19 ± 2.33 | 43.16 ± 9.30 | 10.22 ± 3.56 |
| PC | - | - | - | - |
| N66 | 3,208.69 ± 1,100.72 | 277.54 ± 151.39 | - | 5,783.76 ± 2,395.55 |
| PE | 1,441.13 ± 599.85 | - | - | 5,122.73 ± 2809.69 |
| PET | - | - | - | - |
| ABS | - | - | - | - |
| PUR | - | - | - | - |
| SBR | 281.66 ± 157.69 | - | - | - |
| PS | - | - | - | - |
| **ΣNMPs** | **11,988.55 ± 6,392.18a** | **283.74 ± 150.56b** | **43.16 ± 9.30b** | **13,063.30 ± 6,225.16a** |

**Supplemental Table 3.** Liver concentrations of (a) PAHs, (b) PCBs, and (c) NMPs congeners found in biota collected from Galveston Bay. Levels are reported in ng/g tissue dry weight (DW) for PAHs, PCBs; and in µg/g dry weight (DW) for NMPs (mean ± standard error). Significant differences are denoted using letters. Levels below the limit of detection are represented by “- “.

| **(a) PAHs (ng/g DW)** | **Catfish (n=10)** | **Red drum (n=10)** | **Seatrout (n=7)** |
| --- | --- | --- | --- |
| Low molecular weight (LMW) |  |  |  |
| ACE | 539.44 ± 105.93 | - | - |
| FLU | 762.82 ± 130.88 | 1,421.37 ± 371.30 | 1,046.07 ± 447.25 |
| PHE | 59.21 ± 13.89 | 109.91 ± 39.70 | 181.86 ± 40.46 |
| ANT | 31.87 ± 8.41 | 153.28 ± 58.70 | 71.45 ± 27.62 |
| High molecular weight (HMW) |  |  |  |
| FLT | 10.53 ± 4.89 | 9.95 ± 9.95 | - |
| PYR | 7.90 ± 3.95 | - | - |
| BaA | 13.38 ± 5.31 | - | - |
| CHR | 12.31 ± 4.83 | - | - |
| BbF | 1.12 ± 1.12 | - | - |
| BkF | 0.34 ± 0.34 | - | - |
| BaP | 66.81 ± 19.81 | 27.98 ± 27.98 | 352.18 ± 92.37 |
| IcdP | 52.28 ± 15.77 | 2,273.41 ± 733.34 | - |
| DahA | - | - | - |
| BghiP | 86.71 ± 23.90 | - | - |
| **ΣPAHs** | **1,644.72 ± 61.99a** | **3,995.90 ± 182.84b** | **1,651.56 ± 76.38a** |
| **(b) PCBs (ng/g DW)** | **Catfish (n=10)** | **Red drum (n=10)** | **Seatrout (n=7)** |
| Non-ortho  (dioxin like) |  |  |  |
| PCB 77 | - | - | - |
| PCB 81 | - | - | - |
| PCB 126 | 694.48 ± 241.28 | 333.89 ± 130.25 | 570.41 ± 188.08 |
| PCB 169 | - | 7.72 ± 7.72 | 56.87 ± 56.87 |
| Mono-ortho  (dioxin like) |  |  |  |
| PCB 105 | 45.36 ± 26.14 | 54.78 ± 40.61 | - |
| PCB 114 | 193.78 ± 100.43 | 4.79 ± 3.23 | - |
| PCB 118 | 7.86 ± 6.01 | - | 107.85 ± 49.93 |
| PCB 123 | 7.53 ± 6.49 | - | 86.48 ± 40.84 |
| PCB 156 | 1.49 ± 1.43 | 61.68 ± 30.54 | - |
| PCB 167 | 43.40 ± 26.68 | 1.65 ± 1.65 | 367.89 ± 139.12 |
| PCB 189 | - | - | 0.27 ± 0.27 |
| Non-dioxin like |  |  |  |
| PCB 1 | 43.43 ± 10.65 | - | - |
| PCB 18 | 12.85 ± 10.22 | 90.11 ± 45.37 | 97.16 ± 77.30 |
| PCB 33 | - | - | - |
| PCB 52 | 8.15 ± 5.45 | 18.10 ± 8.89 | - |
| PCB 95 | - | 16.84 ± 13.03 | - |
| PCB 101 | 6.61 ± 6.61 | - | - |
| PCB 128 | 131.96 ± 62.57 | 15.81 ± 15.81 | 706.33 ± 267.99 |
| PCB 138 | 54.09 ± 23.54 | - | 83.33 ± 57.58 |
| PCB 149 | 7.72 ± 3.92 | - | 10.29 ± 7.95 |
| PCB 153 | 38.21 ± 25.58 | - | 23.53 ± 22.74 |
| PCB 157 | - | 6.63 ± 6.22 | 4.06 ± 3.38 |
| PCB 170 | 0.73 ± 0.73 | 14.52 ± 8.71 | 7.82 ± 7.82 |
| PCB 171 | - | - | 2.46 ± 2.46 |
| PCB 177 | - | 2.58 ± 2.58 | - |
| PCB 180 | 33.12 ± 19.72 | - | 20.30 ± 16.91 |
| PCB 183 | 8.36 ± 6.19 | 1.01 ± 1.01 | 16.71 ± 9.62 |
| PCB 187 | 10.62 ± 6.67 | - | - |
| **ΣPCBs** | **1,349.75 ± 25.31** | **630.13 ± 12.25** | **2,161.75 ± 33.19** |
| **(c) NMPs (µg/g DW)** | **Catfish (n=10)** | **Red drum (n=6)** | **Seatrout (n=7)** |
| PMMA | - | - | **-** |
| PP | - | - | **-** |
| PVC | - | - | **-** |
| PA | 50.51 ± 19.24 | 34.75 ± 22.62 | **-** |
| PC | - | - | **-** |
| N66 | 3,950.07 ± 1099.60 | 1,824.10 ± 1123.69 | **-** |
| PE | - | - | **-** |
| PET | - | - | **-** |
| ABS | 57.15 ± 13.45 | - | **-** |
| PUR | 37.87 ± 1.22 | - | **-** |
| SBR | 3,975.20 ± 304.19 | 432.49 ± 145.47 | **-** |
| PS | - | - | **-** |
| **ΣNMPs** | **8,070.80 ± 970.99a** | **2,291.35 ± 1268.41b** | **-** |

**Supplemental Table 4.** Concentration of **total PAH** found in various biotic and abiotic matrix collected from Galveston Bay as well as the Gulf of Mexico and its bays, organized by year.

| **Location** | **Year** | **Air** | **Water** | **Sediment** | **Fish Muscle** | **Body weight** | **Fish Liver** | **Oyster** | **Body weight** | **References** |
| --- | --- | --- | --- | --- | --- | --- | --- | --- | --- | --- |
| Galveston Bay | 1968 |  |  | 479 ng/g |  |  |  |  |  | (Presley et al., 1998) |
| Galveston Bay | 1971 |  |  |  |  |  |  | 10-210 ng/g DW (*Crassostrea virginica*) |  | (Pittinger et al., 1985) |
| Galveston Bay | 1975 |  |  | 250 ng/g |  |  |  |  |  | (Santschi et al., 2001) |
| Galveston Bay | 1978 |  |  | 180 ng/g |  |  |  |  |  | (Santschi et al., 2001) |
| Galveston Bay | 1981 |  |  | 220 ng/g |  |  |  |  |  | (Santschi et al., 2001) |
| Galveston Bay | 1986 |  |  | 190 ng/g |  |  |  |  |  | (Santschi et al., 2001) |
| Galveston Bay | 1986 |  |  | 94 ng/g |  |  |  |  |  | (Jackson et al., 1998) |
| Galveston Bay | 1987 |  |  | 52 ng/g |  |  |  |  |  | (Jackson et al., 1998) |
| Galveston Bay | 1988 |  |  | 174 ng/g |  |  |  |  |  | (Jackson et al., 1998) |
| Galveston Bay | 1989 |  |  | 202 ng/g |  |  |  |  |  | (Jackson et al., 1998) |
| Galveston Bay | 1990 |  |  | 310 ng/g |  |  |  |  |  | (Santschi et al., 2001) |
| Galveston Bay | 1990 |  |  | 120 ng/g |  |  |  |  |  | (Jackson et al., 1998) |
| Galveston Bay | 1991 |  |  | 24 ng/g |  |  |  |  |  | (Jackson et al., 1998) |
| Galveston Bay | 1992 |  |  | 43 ng/g |  |  |  |  |  | (Jackson et al., 1998) |
| Galveston Bay | 1993 |  |  | 78 ng/g |  |  |  |  |  | (Jackson et al., 1998) |
| Galveston Bay | 1994 |  |  | 168 ng/g |  |  |  |  |  | (Jackson et al., 1998) |
| Galveston Bay | 1996 |  |  | 52-153 ng/g |  |  |  |  |  | (Presley et al., 1998) |
| Galveston Bay | 1996 |  |  | 68-724 ng/g |  |  | 393-1,520 ng/g (Hardhead catfish) |  |  | (Willett et al., 1997) |
| Galveston Bay | 1996 |  |  |  |  |  | 406-587 ng/g (Croaker) |  |  | (Willett et al., 1997) |
| Galveston Bay | 1998 |  |  | 19.80 ng/g |  |  |  |  |  | (Lauenstein & Cantillo, 1998) |
| Galveston Bay | 2001 | 0.0246 ng/L |  |  |  |  |  |  |  | (Park et al., 2001b) |
| Galveston Bay | 2001 |  |  | 88-7,128 ng/g |  |  |  | 488-9,227 ng/g DW (*Crassostrea virginica*) |  | (Qian et al., 2001) |
| Galveston Bay | 2001 |  |  | 320 ng/g |  |  |  |  |  | (Santschi et al., 2001) |
| Galveston Bay | 2002 |  |  | 468.4 ± 1,262.78 ng/g |  |  |  |  |  | (Harmon et al., 2003) |
| Galveston Bay | 2012 |  | 800 – 18,230 ng/L | 6100-1885000 ng/g | 5.06-28.62 ng/g WW (Spotted sea trout) |  |  | 203 ± 68 ng/g WW (*Crassostrea virginica*) |  | (Rowe et al., 2021) |
| Galveston Bay | 2014 |  | 1714000 ng/g oil |  |  |  |  |  |  | (Yin et al., 2015) |
| Galveston Bay | 2014 |  | 25.32 ng/L |  |  |  |  |  |  | (Williams. et al., 2017) |
| Galveston Bay | 2017 |  | 25 - 175 ng/L |  |  |  |  |  |  | (Steichen et al., 2020) |
| Galveston Bay | 2017 |  |  | 89.2 ng/g DW |  |  |  |  |  | (Camargo et al., 2021) |
| Galveston Bay | 2017 |  | 44.38 ng/L |  |  |  |  |  |  | (Bacosa et al., 2020) |
| **Galveston Bay** | ***2021*** |  |  |  | ***328.7 ± 9.73 ng/g DW (Gafftopsail catfish)*** | ***1503 ± 97.92 g*** | ***1644.72 ± 61.99 ng/g DW (Gafftopsail catfish)*** | ***608.51 ± 15.72 ng/g DW (Crassotrea virginica)*** | ***12.83 ± 2.19 g*** | ***This study*** |
| **Galveston Bay** | ***2021*** |  |  |  | ***252.06 ± 6.44 ng/g DW (Red drum)*** | ***1611.4 ± 185.61 g*** | ***3995.9 ± 182.84 ng/g DW (Red drum)*** |  |  | ***This study*** |
| **Galveston Bay** | ***2021*** |  |  |  | ***605.3 ± 19.08 ng/g DW (Spotted sea trout)*** | ***1071 ± 207.23 g*** | ***1651.56 ± 76.38 ng/g DW (Spotted sea trout)*** |  |  | ***This study*** |
| **Gulf of Mexico (GOM)** |  | |  |  |  |  |  |  |  |  |
| Aransas Bay | 1971 |  |  |  |  |  |  | 38 ng/g DW (*Crassostrea virginica*) |  | (Pittinger et al., 1985) |
| Matagorda Bay | 1998 |  |  | 11.5 ng/g |  |  |  |  |  | (Geiselbrecht Allison et al., 1998) |
| Corpus Christi Bay | 2001 | 0.00519 ng/L |  |  |  |  |  |  |  | (Park et al., 2001b) |
| GOM | 2008 |  |  | 140 ng/g |  |  |  |  |  | (Wade et al., 2008) |
| Deepwater Horizon Spill (DHS) | 2010 |  | 47 ng/L | 178,725 ng/g | 28.952 ng/g WW |  |  |  |  | (Sammarco et al., 2013) |
| DHS | 2010 |  | 12651000 ng/g oil |  |  |  |  |  |  | (Yin et al., 2015) |
| Gulf of Mexico | 2018 |  |  |  | 1330 ± 164 ng/g WW (Bull shark) |  | 1560 ± 197 ng/g WW (Bull shark) |  |  | (Cullen et al., 2019) |
| Gulf of Mexico | 2018 |  |  |  | 1150 ± 75.7 ng/g WW (Blacktip shark) |  | 2120 ± 106 ng/g WW (Blacktip shark) |  |  | (Cullen et al., 2019) |
| Gulf of Mexico | 2018 |  |  |  | 1080 ± 44.2 ng/g WW (Bonnethead shark) |  | 2200 ± 219 ng/g WW (Bonnethead shark) |  |  | (Cullen et al., 2019) |
| Sabine Lake | 2020 |  |  |  |  |  | 500 ng/g (Gafftopsail catfish) |  |  | (Hernout et al., 2020) |
| Sabine Lake | 2020 |  |  |  |  |  | 850 ng/g (Red drum) |  |  | (Hernout et al., 2020) |
| Sabine Lake | 2020 |  |  |  |  |  | 1800 ng/g (Gar) |  |  | (Hernout et al., 2020) |
| Sabine Lake | 2020 |  |  |  |  |  | 900 ng/g (Bullshark) |  |  | (Hernout et al., 2020) |
| Matagorda Bay | *2021* |  |  |  | *124.40 ± 3.00 ng/g DW (Gafftopsail catfish)* | *415.80 ± 73.92 g* | *680.08 ± 20.98 ng/g DW (Gafftopsail catfish)* | *230.50 ± 7.87 ng/g DW (Crassostrea virginica)* | *41.60 ± 6.52 g* | *(Mortuza et al., 2025)* |
| Matagorda Bay | *2021* |  |  |  | *198.91 ± 7.94 ng/g DW (Red drum)* | *620.71 ± 138.90 g* | *2817.79 ± 142.15 ng/g DW (Red drum)* |  |  | *(Mortuza et al., 2025)* |
| Matagorda Bay | *2021* |  |  |  | *196.40 ± 3.26 ng/g DW (Spotted sea trout)* | *297.78 ± 53.53 g* | *2812.69 ± 163.38 ng/g DW (Spotted sea trout)* |  |  | *(Mortuza et al., 2025)* |

**Supplemental Table 5.** Concentration of **total PCB** found in various biotic and abiotic matrix collected from Galveston Bay as well as the Gulf of Mexico and its bays, organized by year.

| **Location** | **Year** | **Air** | **Water** | **Sediment** | **Fish Muscle** | **Body weight** | **Fish Liver** | **Oyster** | **Body weight** | **Bird** | **References** |
| --- | --- | --- | --- | --- | --- | --- | --- | --- | --- | --- | --- |
| Galveston Bay | 1965 |  |  | ≤13.8 ng/g |  |  |  |  |  |  | (Presley et al., 1998) |
| Galveston Bay | 1965 |  |  | 40.0 ng/g |  |  |  |  |  |  | (Mahler & Van Metre, 2003) |
| Galveston Bay | 1968 |  |  | 67-114 ng/g |  |  |  |  |  |  | (Mahler & Van Metre, 2003) |
| Galveston Bay | 1972 |  |  | 40.0 ng/g |  |  |  |  |  |  | (Mahler & Van Metre, 2003) |
| Galveston Bay | 1972 |  |  | 8.5 ng/g |  |  |  |  |  |  | (Santschi et al., 2001) |
| Galveston Bay | 1978 |  |  | 20.0 ng/g |  |  |  |  |  |  | (Mahler & Van Metre, 2003) |
| Galveston Bay | 1978 |  |  | 7.0 ng/g |  |  |  |  |  |  | (Santschi et al., 2001) |
| Galveston Bay | 1982 |  |  | 5.5 ng/g |  |  |  |  |  |  | (Santschi et al., 2001) |
| Galveston Bay | 1984 |  |  | 18.0 ng/g |  |  |  |  |  |  | (Mahler & Van Metre, 2003) |
| Galveston Bay | 1985 |  |  | 5.2 ng/g |  |  |  |  |  |  | (Santschi et al., 2001) |
| Galveston Bay | 1986 |  |  | 98 ng/g |  |  |  |  |  |  | (Jackson et al., 1998) |
| Galveston Bay | 1986 |  |  |  |  |  |  |  |  | 3440-6990 ng/g WW (Black skimmer, gull, *O. Cormorant*- carcass) | (King & Krynitsky, 1986) |
| Galveston Bay | 1986 |  |  |  |  |  |  |  |  | 3040-4310 ng/g WW (Black skimmer, gull, *O. Cormorant*- egg) | (King & Krynitsky, 1986) |
| Galveston Bay | 1987 |  |  | 63 ng/g |  |  |  |  |  |  | (Jackson et al., 1998) |
| Galveston Bay | 1988 |  |  | 16.0 ng/g |  |  |  |  |  |  | (Mahler & Van Metre, 2003) |
| Galveston Bay | 1988 |  |  | 100 ng/g |  |  |  |  |  |  | (Jackson et al., 1998) |
| Galveston Bay | 1989 |  |  | 113 ng/g |  |  |  |  |  |  | (Jackson et al., 1998) |
| Galveston Bay | 1989 |  |  |  | 260 ng/g WW (Tidewater silverside) | 0.56 g |  |  |  |  | (King, 1989) |
| Galveston Bay | 1989 |  |  |  | 540 ng/g WW (Sheepshead minnow) | 1.02 g |  |  |  |  | (King, 1989) |
| Galveston Bay | 1989 |  |  |  | 70 ng/g WW (Striped mullet) | 7.37 g |  |  |  |  | (King, 1989) |
| Galveston Bay | 1989 |  |  |  | 450 ng/g WW (*Gulf killifish*) | 1.31 g |  |  |  |  | (King, 1989) |
| Galveston Bay | 1989 |  |  |  | 220 ng/g WW (*Gulf menhaden*) | 5.96 g |  |  |  |  | (King, 1989) |
| Galveston Bay | 1990 |  |  | 6.8 ng/g |  |  |  |  |  |  | (Santschi et al., 2001) |
| Galveston Bay | 1990 |  |  | 99 ng/g |  |  |  |  |  |  | (Jackson et al., 1998) |
| Galveston Bay | 1991 |  |  | 45 ng/g |  |  |  |  |  |  | (Jackson et al., 1998) |
| Galveston Bay | 1992 |  |  | 13.5 ng/g |  |  |  |  |  |  | (Mahler & Van Metre, 2003) |
| Galveston Bay | 1992 |  |  | 58 ng/g |  |  |  |  |  |  | (Jackson et al., 1998) |
| Galveston Bay | 1992 |  |  |  |  |  |  | 77-1100 ng/g DW (*Crassostrea virginica*) |  |  | (Sericano et al., 1992) |
| Galveston Bay | 1993 |  |  | 36 ng/g |  |  |  |  |  |  | (Jackson et al., 1998) |
| Galveston Bay | 1993 |  |  |  |  |  |  | 29.3-53.8 ng/g (*Crassostrea virginica*) | 9.6 g |  | (Ellis et al., 1993) |
| Galveston Bay | 1993 |  |  |  |  |  |  | 291.67 ng/g DW (*Crassostrea virginica*) |  |  | (Sericano et al., 1994) |
| Galveston Bay | 1994 |  |  | 86 ng/g |  |  |  |  |  |  | (Jackson et al., 1998) |
| Galveston Bay | 1996 |  |  | 6.1-18.8 ng/g |  |  | 422-3,600 ng/g (Hardhead catfish) |  |  |  | (Willett et al., 1997) |
| Galveston Bay | 1996 |  |  |  |  |  | 380-1,323 ng/g (Croaker) |  |  |  | (Willett et al., 1997) |
| Galveston Bay | 1998 |  |  | 8.5 ng/g |  |  |  |  |  |  | (Mahler & Van Metre, 2003) |
| Galveston Bay | 1998 |  |  | 2.73 ng/g |  |  |  |  |  |  | (Lauenstein & Cantillo, 1998) |
| Galveston Bay | 2001 |  |  | 7-45 ng/g |  |  |  |  |  |  | (Mahler & Van Metre, 2003) |
| Galveston Bay | 2001 | 0.0011361 ng/L |  |  |  |  |  |  |  |  | (Park et al., 2001a) |
| Galveston Bay | 2001 |  |  |  |  |  |  |  |  | 2,390 ng/g WW (Neotropic cormorant, egg) | (Frank et al., 2001) |
| Galveston Bay | 2001 |  |  |  |  |  |  |  |  | 2,100 ng/g WW (Black-crowned night heron, egg) | (Frank et al., 2001) |
| Galveston Bay | 2001 |  |  |  |  |  |  |  |  | 1,510 ng/g WW (Great egret, egg) | (Frank et al., 2001) |
| Galveston Bay | 2001 |  |  | 6.8 ng/g |  |  |  |  |  |  | (Santschi et al., 2001) |
| Galveston Bay | 2002 |  |  | 7.61 ± 8.60 ng/g |  |  |  |  |  |  | (Harmon et al., 2003) |
| Galveston Bay | 2002 |  | 0.565 ng/L | 40.3-67 ng/g | 81.8 ng/g |  |  |  |  |  | (Rifai & Palachek, 2007) |
| Galveston Bay | 2003 |  | 1.365 ng/L |  | 104.2 ng/g |  |  |  |  |  | (Rifai & Palachek, 2007) |
| Galveston Bay | 2003 |  | 0.49 – 12.49 ng/L | 4.18–4601 ng/g DW | 4.13–1596 ng/g WW (Catfish) |  |  |  |  |  | (Howell et al., 2008) |
| Galveston Bay | 2005 |  | 2.5 ng/L | 15,000 ng/g | 10,000 ng/g |  |  |  |  |  | (Howell, Rifai, et al., 2011) |
| Galveston Bay | 2008 |  | 2.2 ± 2.0 ng/L | 26.0 ± 31.0 ng/g DW | 137 ± 108 ng/g WW (Catfish) |  |  |  |  |  | (Lakshmanan et al., 2010) |
| Galveston Bay | 2008 |  |  |  | 285 ± 303 ng/g WW (Seatrout, Atlantic croaker) |  |  |  |  |  | (Lakshmanan et al., 2010) |
| Galveston Bay | 2009 |  | 0.46-9.4 ng/L |  |  |  |  |  |  |  | (Howell, Lakshmanan, et al., 2011) |
| Galveston Bay | 2009 |  | 1-31.2 ng/L |  |  |  |  |  |  |  | (Balasubramani et al., 2014) |
| Galveston Bay | 2011 |  |  |  | 102 ± 66 ng/g WW (Gafftopsail Catfish) |  |  |  |  |  | (Worth, 2013) |
| Galveston Bay | 2011 |  |  |  | 21 ± 11 ng/g WW (Red drum) |  |  |  |  |  | (Worth, 2013) |
| Galveston Bay | 2011 |  |  |  | 52 ± 33 ng/g WW (Spotted seatrout) |  |  |  |  |  | (Worth, 2013) |
| Galveston Bay | 2013 |  |  |  |  |  |  |  |  | 9-55 ng/mL (Oyster catcher, blood) | (Mora et al., 2020) |
| Galveston Bay | 2015 |  | 1.6 ± 0.28 ng/L | 17,000 ng/g |  |  |  |  |  |  | (Howell & Rifai, 2015) |
| Galveston Bay | 2018 |  | 120 ng/g PE | 410 ng/g | 2650 ng/g lipid weight |  |  |  |  |  | (Oziolor et al., 2018) |
| **Galveston Bay** | ***2021*** |  |  |  | ***209.29 ± 2.28 ng/g DW (Gafftopsail catfish)*** | ***1503 ± 97.92 g*** | ***1349.75 ± 25.31 ng/g DW (Gafftopsail catfish)*** | ***286.56 ± 5.65 ng/g DW (Crassostrea virginica)*** | ***12.83 ± 2.19 g*** |  | ***This study*** |
| **Galveston Bay** | ***2021*** |  |  |  | ***14.9 ± 0.28 ng/g DW (Red drum)*** | ***1611.4 ± 185.61 g*** | ***630.13 ± 12.25 ng/g DW (Red drum)*** |  |  |  | ***This study*** |
| **Galveston Bay** | ***2021*** |  |  |  | ***188.69 ± 3.48 ng/g DW (Spotted sea trout)*** | ***1071 ± 207.23 g*** | ***2161.75 ± 33.19 ng/g DW (Spotted sea trout)*** |  |  |  | ***This study*** |
| **Gulf of Mexico (GOM)** |  | |  |  |  |  |  |  |  |  |  |
| Gulf of Mexico | 1987 |  |  |  |  |  |  | 62.3-78.6 ng/g DW (*Crassostrea virginica*) |  |  | (Sericano et al., 1990) |
| DHS | 2010 |  |  | 4.2-5.4 ng/g DW |  |  |  |  |  |  | (Yin et al., 2015) |
| Gulf of Mexico | 2018 |  |  |  | 284 ± 52.7 ng/g WW (Bull shark) |  | 3600 ± 594 ng/g WW (Bull shark) |  |  |  | (Cullen et al., 2019) |
| Gulf of Mexico | 2018 |  |  |  | 219 ± 24.1 ng/g WW (Blacktip shark) |  | 1110 ± 203 ng/g WW (Blacktip shark) |  |  |  | (Cullen et al., 2019) |
| Gulf of Mexico | 2018 |  |  |  | 120 ± 11.6 ng/g WW (Bonnethead shark) |  | 498 ± 80.1 ng/g WW (Bonnethead shark) |  |  |  | (Cullen et al., 2019) |
| Sabine Lake | 2020 |  |  |  |  |  | 1000 ng/g (Gafftopsail catfish) |  |  |  | (Hernout et al., 2020) |
| Sabine Lake | 2020 |  |  |  |  |  | 400 ng/g (Red drum) |  |  |  | (Hernout et al., 2020) |
| Sabine Lake | 2020 |  |  |  |  |  | 3600 ng/g (Gar) |  |  |  | (Hernout et al., 2020) |
| Sabine Lake | 2020 |  |  |  |  |  | 5000 ng/g (Bullshark) |  |  |  | (Hernout et al., 2020) |
| Matagorda Bay | *2021* |  |  |  | *26.25 ± 0.47 ng/g DW (Gafftopsail catfish)* | *415.80 ± 73.92 g* | *392.76 ± 6.27 ng/g DW (Gafftopsail catfish)* | *290.29 ± 4.49 ng/g DW (Crassostrea virginica)* | *41.60 ± 6.52 g* |  | *(Mortuza et al., 2025)* |
| Matagorda Bay | *2021* |  |  |  | *158.53 ± 3.04 ng/g DW (Red drum)* | *620.71 ± 138.90 g* | *2032.02 ± 44.35 ng/g DW (Red drum)* |  |  |  | *(Mortuza et al., 2025)* |
| Matagorda Bay | *2021* |  |  |  | *64.04 ± 1.14 ng/g DW (Spotted sea trout)* | *297.78 ± 53.53 g* | *709.30 ± 9.65 ng/g DW (Spotted sea trout)* |  |  |  | *(Mortuza et al., 2025)* |

**Supplemental Table 6.** Concentration of **total MP** found in various biotic and abiotic matrix collected from Galveston Bay as well as the Gulf of Mexico and its bays, organized by year.

| **Location** | **Year** | **Water** | **Sediment** | **Fish Muscle** | **Body weight** | **Fish Liver** | **Oyster** | **Body weight** | **References** |
| --- | --- | --- | --- | --- | --- | --- | --- | --- | --- |
| Galveston Bay | 2000 |  |  | 873,92 µg/g DW (Clupeids) |  |  |  |  | Our data |
| Galveston Bay | 2000 |  |  | 1732.92 µg/g DW (Mullet) |  |  |  |  | Our data |
| Galveston Bay | 2011 |  |  | 2410.20 µg/g DW (Clupeids) |  |  |  |  | Our data |
| Galveston Bay | 2011 |  |  | 762.96 µg/g DW (Mullet) |  |  |  |  | Our data |
| Galveston Bay | 2015 |  |  | 646.40 µg/g DW (Juvenile Trout) |  |  |  |  | Our data |
| Galveston Bay | 2019 |  |  | 640.40 µg/g DW (Juvenile Trout) |  |  |  |  | Our data |
| Galveston Bay | 2021 |  | 0.157 µg/g |  |  |  |  |  | (Wharton, 2021) |
| **Galveston Bay** | ***2021*** |  |  | ***283.74 ± 150.56 µg/g DW (Gafftopsail catfish)*** | ***1503 ± 97.92 g*** | ***8070.80 ± 970.99 µg/g DW (Gafftopsail catfish)*** | ***11988.55 ± 6392.18 µg/g DW (Crassostrea virginica)*** | ***12.83 ± 2.19 g*** | ***This study*** |
| **Galveston Bay** | ***2021*** |  |  | ***43.16 ± 9.30 µg/g DW (Red drum)*** | ***1611.4 ± 185.61 g*** | ***2291.35 ± 1268.41 µg/g DW (Red drum)*** |  |  | ***This study*** |
| **Galveston Bay** | ***2021*** |  |  | ***13063.30 ± 6225.16 µg/g DW (Spotted sea trout)*** | ***1071 ± 207.23 g*** | ***0.00 ± 0.00 µg/g DW (Spotted sea trout)*** |  |  | ***This study*** |
| Galveston Bay | *2022* |  | 3.6-11.5 MPs/m2 |  |  |  |  |  | (Hayden & Cowger, 2022) |
| Galveston Bay | 2023 | 0.1-0.3 µg/L |  |  |  |  |  |  | (Wharton et al., 2024) |
| Galveston Bay | 2023 | 8 µg/L | 8.76 µg/g |  |  |  |  |  | *Our data* |
| Galveston Bay | 2023 |  | 0.0065 µg/g |  |  |  |  |  | (Summers et al., 2024) |
| **Gulf of Mexico (GOM)** |  |  |  |  |  |  |  |  |  |
| Mobile Bay, Alabama | 2016 |  | 15-75 MPs/m2 |  |  |  |  |  | (Wessel et al., 2016) |
| Coast of Louisiana | 2017 | 4.8-18.4 particles/m3 |  |  |  |  |  |  | (Di Mauro et al., 2017) |
| Coast of Florida | 2018 |  | 61.08 ± 34.61 pieces/m2 |  |  |  |  |  | (Beckwith & Fuentes, 2018) |
| Mosquito Lagoon, FL | 2018 | 15-35 MPs/L |  |  |  |  | 7-23 MPs/ individual (*Crassostrea virginica*) |  | (Waite et al., 2018) |
| Campeche Bay | 2020 |  |  | 115 items/intestine (White grunt) | 318 ± 63 g |  |  |  | (Borges-Ramírez et al., 2020) |
| Campeche Bay | 2020 |  |  | 48 items/intestine (Pigfish) | 258 ± 40 g |  |  |  | (Borges-Ramírez et al., 2020) |
| Campeche Bay | 2020 |  |  | 27 items/intestine (Red snapper) | 209 ± 88 g |  |  |  | (Borges-Ramírez et al., 2020) |
| Campeche Bay | 2020 |  |  | 52 items/intestine (Grey snapper) | 428 ± 92 g |  |  |  | (Borges-Ramírez et al., 2020) |
| Campeche Bay | 2020 |  |  | 35 items/intestine (Blue runner) | 230 ± 88 g |  |  |  | (Borges-Ramírez et al., 2020) |
| Campeche Bay | 2020 |  |  | 40 items/intestine (Striped mullet) | 472 ± 59 g |  |  |  | (Borges-Ramírez et al., 2020) |
| Tecolutla, Mexico | 2021 | 151 MPs/L | 121 MPs/Kg DW | 4.7 MPs/ intestine |  |  |  |  | (Sánchez-Hernández et al., 2021) |
| Matagorda Bay | *2021* |  |  | *1636.97 ± 786.63 µg/g DW (Gafftopsail catfish)* | *415.80 ± 73.92 g* |  | *8925.72 ± 2608.77 µg/g DW (Crassostrea virginica)* | *41.60 ± 6.52 g* | *(Mortuza et al., 2025)* |
| Matagorda Bay | *2021* |  |  | *355.42 ± 183.75 µg/g DW (Red drum)* | *620.71 ± 138.90 g* | *18166.10 ± 7352.24 µg/g DW (Red drum)* |  |  | *(Mortuza et al., 2025)* |
| Matagorda Bay | *2021* |  |  | *966.71 ± 206.69 µg/g DW (Spotted sea trout)* | *297.78 ± 53.53 g* | *6536.69 ± 5176.33 µg/g DW (Spotted sea trout)* |  |  | *(Mortuza et al., 2025)* |
| Mustang island, Texas | 2022 |  | 2.5-76.6 MPs/m2 |  |  |  |  |  | (Hayden & Cowger, 2022) |
| Mustang island, Texas | | 2022 |  | 3.6-6.7 MPs/m2 |  |  |  |  |  | (Hayden & Cowger, 2022) |
|  |  |  |  |  |  |  |  |  |  |
| Tecolutla beach, Mexico | 2022 |  | 2-54 MPs/Kg sediment |  |  |  |  |  | (Flores-Cortés & Armstrong-Altrin, 2022) |
| Louisiana | 2023 | 1.8135 µg/L |  |  |  |  |  |  | Our data |
| Matagorda | 2023 | 0.791 µg/L |  |  |  |  |  |  | Our data |
| Mississippi | 2023 | 0.1445 µg/L |  |  |  |  |  |  | Our data |
| Sontecomapan lagoon, Mexico | 2023 | 7.5 ± 5.3 items/L | 8.5 ± 12.5  items/g |  |  |  |  |  | (Sánchez-Campos et al., 2024) |
| Leguna de Terminos | 2023 | 10-18 MPs/L | 100-385 MPs/g DW |  |  |  | 3-4 MPs/g WW (*C. virginica)* |  | (Celis-Hernandez et al., 2023) |
| Mississippi sound | 2023 |  |  |  |  |  | 30.7 ± 11.5 to 4.7 ± 0.25 MPs/g WW (*C. virginica)* | 10.2-21.2 g | (Wontor et al., 2023) |
| Matagorda Bay | 2024 |  | 110,400 items/m3 |  |  |  |  |  | (Bailey et al., 2025) |
| Galveston Bay |  |  |  |  |  |  | MPs/g WW (*C. virginica)* |  | Ciesielski et al. 2025 |

**References**

Bacosa, H. P., Steichen, J., Kamalanathan, M., Windham, R., Lubguban, A., Labonté, J. M., Kaiser, K., Hala, D., Santschi, P. H., & Quigg, A. (2020). Polycyclic aromatic hydrocarbons (PAHs) and putative PAH-degrading bacteria in Galveston Bay, TX (USA), following Hurricane Harvey (2017). *Environmental Science and Pollution Research*, *27*(28), 34987–34999. <https://doi.org/10.1007/s11356-020-09754-5>

Bailey, W. S., Olariu, C., & Mohrig, D. (2025). Microplastics in Bays along the Central Texas Coast. *Environmental Science & Technology*, *59*(10), 5249–5260.

Balasubramani, A., Howell, N. L., & Rifai, H. S. (2014). Polychlorinated biphenyls (PCBs) in industrial and municipal effluents: concentrations, congener profiles, and partitioning onto particulates and organic carbon. *Science of The Total Environment*, *473*, 702–713.

Beckwith, V. K., & Fuentes, M. M. P. B. (2018). Microplastic at nesting grounds used by the northern Gulf of Mexico loggerhead recovery unit. *Marine Pollution Bulletin*, *131*, 32–37. <https://doi.org/https://doi.org/10.1016/j.marpolbul.2018.04.001>

Borges-Ramírez, M. M., Mendoza-Franco, E. F., Escalona-Segura, G., & Osten, J. R.-v. (2020). Plastic density as a key factor in the presence of microplastic in the gastrointestinal tract of commercial fishes from Campeche Bay, Mexico. *Environmental Pollution*, *267*, 115659. <https://doi.org/https://doi.org/10.1016/j.envpol.2020.115659>

Camargo, K., Sericano, J. L., Bhandari, S., Hoelscher, C., McDonald, T. J., Chiu, W. A., Wade, T. L., Dellapenna, T. M., Liu, Y., & Knap, A. H. (2021). Polycyclic aromatic hydrocarbon status in post-hurricane Harvey sediments: Considerations for environmental sampling in the Galveston Bay/Houston Ship Channel region. *Marine Pollution Bulletin*, *162*, 111872. <https://doi.org/https://doi.org/10.1016/j.marpolbul.2020.111872>

Celis-Hernandez, O., Ávila, E., Rendón-von Osten, J., Briceño-Vera, E. A., Borges-Ramírez, M. M., Gómez-Ponce, A. M., & Capparelli, V. M. (2023). Environmental risk of microplastics in a Mexican coastal lagoon ecosystem: Anthropogenic inputs and its possible human food risk. *Science of The Total Environment*, *879*, 163095. <https://doi.org/https://doi.org/10.1016/j.scitotenv.2023.163095>

Cullen, J. A., Marshall, C. D., & Hala, D. (2019). Integration of multi-tissue PAH and PCB burdens with biomarker activity in three coastal shark species from the northwestern Gulf of Mexico. *Science of The Total Environment*, *650*, 1158–1172. <https://doi.org/https://doi.org/10.1016/j.scitotenv.2018.09.128>

Di Mauro, R., Kupchik, M. J., & Benfield, M. C. (2017). Abundant plankton-sized microplastic particles in shelf waters of the northern Gulf of Mexico. *Environmental Pollution*, *230*, 798–809. <https://doi.org/https://doi.org/10.1016/j.envpol.2017.07.030>

Ellis, M. S., Choi, K.-S., Wade, T. L., Powell, E. N., Jackson, T. J., & Lewis, D. H. (1993). Sources of local variation in polynuclear aromatic hydrocarbon and pesticide body burden in oysters (Crassostrea virginica) from Galveston Bay, Texas. *Comparative Biochemistry and Physiology Part C: Pharmacology, Toxicology and Endocrinology*, *106*(3), 689–698.

Flores-Cortés, M., & Armstrong-Altrin, J. S. (2022). Textural characteristics and abundance of microplastics in Tecolutla beach sediments, Gulf of Mexico. *Environmental Monitoring and Assessment*, *194*(10), 752. <https://doi.org/10.1007/s10661-022-10447-4>

Frank, D. S., Mora, M. A., Sericano, J. L., Blankenship, A. L., Kannan, K., & Giesy, J. P. (2001). Persistent organochlorine pollutants in eggs of colonial waterbirds from Galveston Bay and East Texas, USA. *Environmental Toxicology and Chemistry*, *20*(3), 608–617. <https://doi.org/10.1002/etc.5620200321>

Geiselbrecht Allison, D., Hedlund Brian, P., Tichi Mary, A., & Staley, J. T. (1998). Isolation of Marine Polycyclic Aromatic Hydrocarbon (PAH)-Degrading Cycloclasticus Strains from the Gulf of Mexico and Comparison of Their PAH Degradation Ability with That of Puget Sound Cycloclasticus Strains. *Applied and Environmental Microbiology*, *64*(12), 4703–4710. <https://doi.org/10.1128/AEM.64.12.4703-4710.1998>

Harmon, M. R., Pait, A. S., & Hameedi, M. J. (2003). *Sediment contamination, toxicity, and macroinvertebrate infaunal community in Galveston Bay*. Retrieved 12/17/24 from <https://repository.library.noaa.gov/view/noaa/2413/noaa_2413_DS1.pdf>

Hayden, M., & Cowger, W. (2022). Quantitative Analysis of Microplastics on Texas Beaches. *OCEANS 2022*, 1–4.

Hernout, B., Leleux, J., Lynch, J., Ramaswamy, K., Faulkner, P., Matich, P., & Hala, D. (2020). The integration of fatty acid biomarkers of trophic ecology with pollutant body-burdens of PAHs and PCBs in four species of fish from Sabine Lake, Texas. *Environmental Advances*, *1*, 100001. <https://doi.org/https://doi.org/10.1016/j.envadv.2020.100001>

Howell, N. L., Lakshmanan, D., Rifai, H. S., & Koenig, L. (2011). PCB dry and wet weather concentration and load comparisons in Houston-area urban channels. *Science of The Total Environment*, *409*(10), 1867–1888.

Howell, N. L., & Rifai, H. S. (2015). Longitudinal estimates of sediment-water diffusive flux of PCB congeners in the Houston Ship Channel. *Estuarine, Coastal and Shelf Science*, *164*, 19–27.

Howell, N. L., Rifai, H. S., & Koenig, L. (2011). Comparative distribution, sourcing, and chemical behavior of PCDD/Fs and PCBs in an estuary environment. *Chemosphere*, *83*(6), 873–881.

Howell, N. L., Suarez, M. P., Rifai, H. S., & Koenig, L. (2008). Concentrations of polychlorinated biphenyls (PCBs) in water, sediment, and aquatic biota in the Houston Ship Channel, Texas. *Chemosphere*, *70*(4), 593–606.

Jackson, T. J., Wade, T. L., Sericano, J. L., Brooks, J. M., Wong, J. M., Garcia-Romero, B., & McDonald, T. J. (1998). Galveston Bay: Temporal changes in the concentrations of trace organic contaminants in national status and trends oysters (1986–1994). *Estuaries*, *21*(4), 718–730. <https://doi.org/10.2307/1353276>

King, K. A. (1989). Food habits and organochlorine contaminants in the diet of Black Skimmers, Galveston Bay, Texas, USA. *Colonial Waterbirds*, 109–112.

King, K. A., & Krynitsky, A. J. (1986). Population trends, reproductive success, and organochlorine chemical contaminants in waterbirds nesting in Galveston Bay, Texas. *Archives of environmental contamination and toxicology*, *15*(4), 367–376.

Lakshmanan, D., Howell, N. L., Rifai, H. S., & Koenig, L. (2010). Spatial and temporal variation of polychlorinated biphenyls in the Houston Ship Channel. *Chemosphere*, *80*(2), 100–112.

Lauenstein, G., & Cantillo, A. Y. (1998). *Sampling and analytical methods of the national status and trends program mussel watch project: 1993-1996 update*. <https://repository.library.noaa.gov/view/noaa/22776>

Mahler, B., & Van Metre, P. (2003). *A chronicle of organochlorine contamination in Clear Creek, Galveston and Harris Counties, Texas, 1960-2002, as recorded in sediment cores* (2327-6932).

Mora, M. A., Heath, S. A., Bohannon, M., & Bowerman, W. W. (2020). Organochlorine pesticides and polychlorinated biphenyls in American oystercatchers nesting along the Texas Gulf Coast. *Waterbirds*, *43*(3-4), 292–298.

Mortuza, A., Meese, E. N., Wharton, M., Gahn, B., Petersen, L. H., Quigg, A., Wells, R. J. D., Kaiser, K., & Hala, D. (2025). Comparing persistent (polycyclic aromatic hydrocarbons and polychlorinated biphenyls) and emerging nano(micro)plastics (NMPs) pollutant body-burdens in oysters and fish from Matagorda Bay (Texas, USA). *Marine Pollution Bulletin*, *221*, 118495. <https://doi.org/https://doi.org/10.1016/j.marpolbul.2025.118495>

Oziolor, E. M., Apell, J. N., Winfield, Z. C., Back, J. A., Usenko, S., & Matson, C. W. (2018). Polychlorinated biphenyl (PCB) contamination in Galveston Bay, Texas: Comparing concentrations and profiles in sediments, passive samplers, and fish. *Environmental Pollution*, *236*, 609–618.

Park, J.-S., Wade, T. L., & Sweet, S. (2001a). Atmospheric deposition of organochlorine contaminants to Galveston Bay, Texas. *Atmospheric Environment*, *35*(19), 3315–3324.

Park, J.-S., Wade, T. L., & Sweet, S. (2001b). Atmospheric distribution of polycyclic aromatic hydrocarbons and deposition to Galveston Bay, Texas, USA. *Atmospheric Environment*, *35*(19), 3241–3249. <https://doi.org/https://doi.org/10.1016/S1352-2310(01)00080-2>

Pittinger, C. A., Buikema, A. L., Jr., Hornor, S. G., & Young, R. W. (1985). Variation in tissue burdens of polycyclic aromatic hydrocarbons in indigenous and relocated oysters. *Environmental Toxicology and Chemistry*, *4*(3), 379–387. <https://doi.org/10.1002/etc.5620040313>

Presley, B., Wade, T., Santschi, P., & Baskaran, M. (1998). *Historical contamination of Mississippi River Delta, Tampa Bay, and Galveston Bay sediments*. <https://repository.library.noaa.gov/view/noaa/30783/noaa_30783_DS1.pdf>

Qian, Y., Wade, T. L., & Sericano, J. L. (2001). Sources and bioavailability of polynuclear aromatic hydrocarbons in Galveston Bay, Texas. *Estuaries*, *24*(6), 817–827. <https://doi.org/10.2307/1353173>

Rifai, H., & Palachek, R. (2007). *Total maximum daily loads for PCBs in the Houston Ship Channel*. <https://www.tceq.texas.gov/downloads/water-quality/tmdl/houston-ship-galveston-bay-fish-consumption-assessment-78/78-2007-july-quarterly-report.pdf>

Rowe, G. T., Fernando, H., Elferink, C., Ansari, G. A. S., Sullivan, J., Heathman, T., Quigg, A., Petronella Croisant, S., Wade, T. L., & Santschi, P. H. (2021). Polycyclic aromatic hydrocarbons (PAHs) cycling and fates in Galveston Bay, Texas, USA. *PLOS ONE*, *15*(12), e0243734. <https://doi.org/10.1371/journal.pone.0243734>

Sammarco, P. W., Kolian, S. R., Warby, R. A. F., Bouldin, J. L., Subra, W. A., & Porter, S. A. (2013). Distribution and concentrations of petroleum hydrocarbons associated with the BP/Deepwater Horizon Oil Spill, Gulf of Mexico. *Marine Pollution Bulletin*, *73*(1), 129–143. <https://doi.org/https://doi.org/10.1016/j.marpolbul.2013.05.029>

Sánchez-Campos, M., Ponce-Vélez, G., Sanvicente-Añorve, L., & Alatorre-Mendieta, M. (2024). Microplastic contamination in three environmental compartments of a coastal lagoon in the southern Gulf of Mexico. *Environmental Monitoring and Assessment*, *196*(11), 1012. <https://doi.org/10.1007/s10661-024-13156-2>

Sánchez-Hernández, L. J., Ramírez-Romero, P., Rodríguez-González, F., Ramos-Sánchez, V. H., Márquez Montes, R. A., Romero-Paredes Rubio, H., Sujitha, S. B., & Jonathan, M. P. (2021). Seasonal evidences of microplastics in environmental matrices of a tourist dominated urban estuary in Gulf of Mexico, Mexico. *Chemosphere*, *277*, 130261. <https://doi.org/https://doi.org/10.1016/j.chemosphere.2021.130261>

Santschi, P. H., Presley, B. J., Wade, T. L., Garcia-Romero, B., & Baskaran, M. (2001). Historical contamination of PAHs, PCBs, DDTs, and heavy metals in Mississippi river Delta, Galveston bay and Tampa bay sediment cores. *Marine Environmental Research*, *52*(1), 51–79.

Sericano, J., Atlas, E. L., Wade, T. L., & Brooks, J. M. (1990). NOAA's status and trends mussel watch program: chlorinated pesticides and PCBs in oysters (Crassostrea virginica) and sediments from the Gulf of Mexico, 1986–1987. *Marine Environmental Research*, *29*(3), 161–203.

Sericano, J., Wade, T. L., El-Husseini, A. M., & Brooks, J. M. (1992). Environmental significance of the uptake and depuration of planar PCB congeners by the American oyster (Crassostrea virginica). *Marine Pollution Bulletin*, *24*(11), 537–543.

Sericano, J. L., Wade, T. L., Brooks, J. M., & Safe, S. H. (1994). Toxicological significance of non-, mono- and di-ortho-substituted polychlorinated biphenyls in oysters from galveston and tampa bays. *Environmental Toxicology and Chemistry*, *13*(11), 1797–1803. <https://doi.org/https://doi.org/10.1002/etc.5620131111>

Steichen, J. L., Labonté, J. M., Windham, R., Hala, D., Kaiser, K., Setta, S., Faulkner, P. C., Bacosa, H., Yan, G., & Kamalanathan, M. (2020). Microbial, physical, and chemical changes in Galveston Bay following an extreme flooding event, Hurricane Harvey. *Frontiers in Marine Science*, *7*, 186.

Summers, E., Du, J., Park, K., Wharton, M., & Kaiser, K. (2024). Importance of the water-sediment bed interactions in simulating microplastic particles in an estuarine system. *Frontiers in Marine Science*, *11*, 1414459.

Wade, T. L., Soliman, Y., Sweet, S. T., Wolff, G. A., & Presley, B. J. (2008). Trace elements and polycyclic aromatic hydrocarbons (PAHs) concentrations in deep Gulf of Mexico sediments. *Deep Sea Research Part II: Topical Studies in Oceanography*, *55*(24-26), 2585–2593.

Waite, H. R., Donnelly, M. J., & Walters, L. J. (2018). Quantity and types of microplastics in the organic tissues of the eastern oyster Crassostrea virginica and Atlantic mud crab Panopeus herbstii from a Florida estuary. *Marine Pollution Bulletin*, *129*(1), 179–185. <https://doi.org/https://doi.org/10.1016/j.marpolbul.2018.02.026>

Wessel, C. C., Lockridge, G. R., Battiste, D., & Cebrian, J. (2016). Abundance and characteristics of microplastics in beach sediments: Insights into microplastic accumulation in northern Gulf of Mexico estuaries. *Marine Pollution Bulletin*, *109*(1), 178–183. <https://doi.org/https://doi.org/10.1016/j.marpolbul.2016.06.002>

Wharton, B. M. (2021). *Analysis and Quantification of Microplastics in Galveston Bay* Texas A&M University]. <https://oaktrust.library.tamu.edu/items/bec0b76f-ec90-41a8-a268-7d4be2306dcb>

Wharton, M., Gahn, M. B., Hala, D., Du, J., Park, K., & Kaiser, K. (2024). Quantifying Microplastic Contamination in Galveston Bay and the Gulf of Mexico watershed. Proceedings of the American Geophysical Union, Ocean Sciences Meeting, New Orleans, LA.

Willett, K. L., McDonald, S. J., Steinberg, M. A., Beatty, K. B., Kennicutt, M. C., & Safe, S. H. (1997). Biomarker sensitivity for polynuclear aromatic hydrocarbon contamination in two marine fish species collected in Galveston Bay, Texas. *Environmental Toxicology and Chemistry*, *16*(7), 1472–1479. <https://doi.org/10.1002/etc.5620160721>

Williams., Bacosa, H. P., & Quigg, A. (2017). The impact of dissolved inorganic nitrogen and phosphorous on responses of microbial plankton to the Texas City “Y” oil spill in Galveston Bay, Texas (USA). *Marine Pollution Bulletin*, *121*(1), 32–44. <https://doi.org/https://doi.org/10.1016/j.marpolbul.2017.05.033>

Wontor, K., Cizdziel, J. V., Scircle, A., Gochfeld, D. J., & Pandelides, A. F. (2023). Prevalence and Distribution of Microplastics in Oysters from the Mississippi Sound. *Journal of Contemporary Water Research & Education*, *177*(1), 31–45. <https://doi.org/https://doi.org/10.1111/j.1936-704X.2022.3379.x>

Worth, L. (2013). *Characterization of Potential Adverse Health Effects Associated with Consuming Fish from*. <https://www.dshs.texas.gov/sites/default/files/seafood/PDF2/Risk-Characterization/LakeWorthRC2016R.pdf>

Yin, F., Hayworth, J. S., & Clement, T. P. (2015). A Tale of Two Recent Spills—Comparison of 2014 Galveston Bay and 2010 Deepwater Horizon Oil Spill Residues. *PLOS ONE*, *10*(2), e0118098. <https://doi.org/10.1371/journal.pone.0118098>
